# Supplementary material for: Factors Influencing Blood Donation Intentions among Adults in the East Gojjam Zone, Northwest Ethiopia
Source: Research Square preprint supplement (doi:10.21203/rs.3.rs-6433089/v1), 2026-01-02
Supplement: Supplementary file 1 [file 9f137866dafd328a36c169ca.docx]

# APPENDIXES

1. **Information Sheet and Consent Form**

**Title:** Factors Associated with Intention and Practice of Blood Donation among Adults in the East Gojjam Zone, Northwest Ethiopia

**Introduction**

This information sheet and consent form are part of a research study aiming to understand the factors influencing adults' decisions about blood donation in the East Gojjam Zone of northwest Ethiopia. The research team comprises the principal investigator, Nigusie Gashaye, along with five co-investigators, six trained data collectors, and three supervisors – all affiliated with Debre Markos University.

**Purpose of the Study**

This study will assess the factors that influence adults' intentions and practices related to blood donation within the East Gojjam Zone. The findings will be used to develop effective intervention programs aimed at increasing access to blood donation opportunities in the area.

**What will your participation involve?**

If you choose to participate, we will first provide a detailed explanation of the study and answer any questions you may have. You will then be asked to sign a written consent form indicating your voluntary participation. The study will involve a single interview lasting approximately 30 minutes. During the interview, we will ask questions about your background (demographics), your attitudes and experiences with blood donation, and your knowledge about blood donation practices.

**Benefits, Risks, and Discomfort**

Your participation in this study is valuable. It will contribute to a better understanding of blood donation behavior and experience in the East Gojjam Zone. There is no direct benefit or risk associated with participating in this research project. However, you may experience some minor inconvenience by dedicating your time to the interview.

**Compensation and Confidentiality**

There will be no financial compensation or incentives offered for participating in this study. We are committed to protecting your privacy. Your interview will be conducted in a private setting with only the interviewer present. All information collected from you will be kept confidential. We will assign a unique code number to your data to ensure anonymity. No report of the study will ever identify you personally.

**Your Right to Refuse or Withdraw**

Participation in this research is entirely voluntary. You have the right to refuse to participate in the study at any time, even after signing the consent form. You can also withdraw from the study at any point without any consequences.

**Who to Contact for Questions**

This research project has been reviewed and approved by the ethical committee of Debre Markos University. If you have any questions about the study or your rights as a participant, please do not hesitate to contact:

- Nigusie Gashaye (Principal Investigator)
- Phone: +251927605922
- Email: nigusie27@gmail.com
- Institution: Debre Markos University, Natural and Computational Sciences Research and Community Service Vice Dean

## Consent Form

I have read the above information sheet or it has been read to me. The study has been explained to me in detail, and I have had a chance to ask questions and received satisfactory answers. I understand that if I have any other questions later about the research or about my rights as a research subject, I can call the Ethical Review Committee. I also understand that I will receive a copy of this Consent Form if I choose to participate.

**Please select one:**

- _____ I agree to participate in this project.
- _____ I do not wish to participate in this project.

**Name of participant:** _________________________

**Date:** _________________

**Signature of participant:** _____________________________

(Or thumbprint if the individual cannot write)

**WITNESS (Only necessary if the individual cannot read/write):**

Name of Witness: ____________________________________

Signature of Witness: _________________________________

**Date:** _______________

**STUDY STAFF**

Name of Study Staff conducting consent: _____________________

Signature of Staff conducting consent: __________________

**Date:** _______________

**English Questionnaire: Factors Associated with Intention of Blood Donation and Factors Associated with Practice of Blood Donation**

Instructions: Please circle the best answer(s) for each question, or fill in the blank space provided. We are conducting this survey to understand attitudes and practices related to blood donation in the East Gojjam Zone. Your participation is voluntary and anonymous. Your honest responses will greatly help improve blood donation awareness and accessibility.

1. Woredas/town: ________________________.
2. Age: ____________________________ years.
3. Gender:
   - Male
   - Female
   - Non-binary/Other (Please specify: ____________)
4. Highest Level of Education:
   - No formal education
   - Primary school
   - Secondary school
   - College/University Graduates
   - Vocational/Technical training
   - Other (Please specify: ___________________)
5. Occupation: ________________________________
6. Religious:__________________________________
7. Marital Status: (Optional)
   - Single
   - Married
   - Divorced/Separated
   - Widowed
   - Other (Please specify: _______________)
8. Have you ever donated blood?
   - Yes
   - No
9. If donating blood, how many times have you donated blood in the previous years? ________________.
10. If you answered no to donating blood, why haven't you donated? (Please specify) _______________________________________________________________________.
11. Did you have heard about blood donation?
    - Yes
    - No
12. If you heard about blood donation where do you get most of your information about blood donation? (Select all that apply)
    - Family/friends
    - Healthcare professionals
    - Media (Specify: TV, radio, social media)
    - Community events/campaigns
    - Flyers/posters
    - Internet/websites
    - Other (Please specify: _______________________________________________)
13. Do you believe religious or cultural beliefs affect people's willingness to donate blood?
    - Yes
    - No
    - Unsure
14. Do financial limitations prevent you from donating blood in your area?
    - Yes
    - No
    - Unsure
15. Have you ever participated in a blood donation campaign?
    - Yes
    - No
16. If you have no participated in a blood donation campaign why not? _________________________________________________________________________
17. This questionnaire asks about the important of blood donation. Please rate each statement on a scale of 1 (Not important at all) to 5 (Very important). Place a tick mark under the number that best reflects your level of agreement.

| Questions | 1 | 2 | 3 | 4 | 5 |
| --- | --- | --- | --- | --- | --- |
| How important do you consider blood donation to be? |  |  |  |  |  |

1. This questionnaire asks about perceivition of the blood donation process. Please rate each statement on a scale of 1 (Very difficult) to 5 (Very easy). Place a tick mark under the number that best reflects your level of agreement.

| Questions | 1 | 2 | 3 | 4 | 5 |
| --- | --- | --- | --- | --- | --- |
| How easy do you perceive the blood donation process to be? |  |  |  |  |  |

1. What motivates you personally to donate blood? (Select all that apply)
   - Helping others in need
   - Personal satisfaction
   - Feeling a sense of social responsibility
   - Encouragement from family/friends
   - Altruism
   - Other (Please specify: _______________________________________________)
2. How much influence does encouragement from family and friends have on your decision to donate blood?
   - A great deal
   - Some
   - None
3. What barriers do you face that prevent you from donating blood more often? (Select all that apply)
   - Fear of needles/blood (blood phobia)
   - Safety or health concerns
   - Lack of awareness of donation opportunities
   - Inconvenient location or timing of centers
   - Feeling ineligible due to health reasons (Please specify: ____________________)
   - Transportation issues
   - Financial limitations
   - Lack of trust in the blood donation process
   - Other (Please specify: _______________________________________________)
4. How likely would you be to donate blood if offered an incentive, such as transportation reimbursement or a small gift card?
   - Very likely
   - Somewhat likely
   - Not likely
   - Unsure
5. This section assesses your knowledge about blood donation. Please answer each question to the best of your ability.

| **Knowledge assessment items** | | Correct response |
| --- | --- | --- |
| Do highly bleeding individuals with an accident need blood? | No |  |
| Yes |  |
| Do mothers who bleed during delivery need blood? | No |  |
| Yes |  |
| Do patients undergoing major surgery need blood? | No |  |
| Yes |  |
| Do severe anemic patients need blood? | No |  |
| Yes |  |
| At what age are individuals eligible to donate blood? | <18 |  |
| 18-65 |  |
| >65 |  |
| Don’t know |  |
| Who is eligible to donate blood? | Male |  |
| Female |  |
| Both |  |
| What is the typical amount of blood donated at one time? | 350-450ml |  |
| 500ml |  |
| 200ml |  |
| Don’t know |  |
| How long can blood typically remain on the shelf before it expires? | 1 month |  |
| 2 months |  |
| >3months |  |
| Don’t know |  |
| What is the recommended interval between blood donations? | Every week |  |
| Every month |  |
| Every three month |  |
| Every year |  |
| Don’t know |  |
| What is the minimum weight required for blood donation? | <45kg |  |
| 45kg |  |
| >45kg |  |
| Don’t know |  |

1. This questionnaire asks about your beliefs regarding blood donation behaviors. Please rate each statement on a scale of 1 (strongly disagree) to 5 (strongly agree). Place a tick mark under the number that best reflects your level of agreement.

| Constructs of the blood behavior study | | Questionnaire items | 1 | 2 | 3 | 4 | 5 |
| --- | --- | --- | --- | --- | --- | --- | --- |
| Intention | | I expect to donate blood in the coming three months |  |  |  |  |  |
| I want to donate blood in the coming three months |  |  |  |  |  |
| I intend to donate blood in the coming three months |  |  |  |  |  |
| Attitude (direct measure) | | Overall, I think donating blood is pleasant |  |  |  |  |  |
| Overall, I think donating blood is the wrong thing to do |  |  |  |  |  |
| Overall, I think donating blood is a good idea |  |  |  |  |  |
| Overall, I think donating blood is unnecessary |  |  |  |  |  |
| Attitude (indirect measure) | Behavioral beliefs | If I donate blood, I will feel that I am doing something harmful to myself |  |  |  |  |  |
| If I donate blood, I will save patients’ lives |  |  |  |  |  |
| If I donate blood, I will become anemic |  |  |  |  |  |
| If I donate blood, I will lose weight |  |  |  |  |  |
| Outcome evaluations | Doing something harmful to myself is desirable to me |  |  |  |  |  |
| Doing something that saves patients’ lives is desirable to me |  |  |  |  |  |
| Becoming anemic is desirable to me |  |  |  |  |  |
| Losing weight is desirable to me |  |  |  |  |  |
| Subjective norm (direct measure) | | People who are important to me think that I should NOT donate blood |  |  |  |  |  |
| I feel under social pressure to donate blood |  |  |  |  |  |
| I am expected to donate blood |  |  |  |  |  |
| People who are important to me want me to donate blood |  |  |  |  |  |
| Subjective norm (indirect measure) | Normative beliefs | My parents think I should donate blood |  |  |  |  |  |
| My closest friend would disapprove of my donating blood |  |  |  |  |  |
| My classmates think I should donate blood |  |  |  |  |  |
| Motivation to comply | Doing what my parents do is important to me |  |  |  |  |  |
| My closest friend’s approval of what I do is important to me |  |  |  |  |  |
| Doing what my classmates think I should do is important to me |  |  |  |  |  |
| Self-efficacy | | I am confident I could donate blood if I am asked to do so |  |  |  |  |  |
| I think I am too weak to donate blood |  |  |  |  |  |
| For me, it is easy to donate blood |  |  |  |  |  |
| I think I do not have enough blood to donate |  |  |  |  |  |

1. This section assesses beliefs about blood donation. Please provide your own beliefs about blood donation to the best of your knowledge.

| Construct on beliefs of blood donation | Questionnaire items |
| --- | --- |
| Behavioral beliefs | What are the advantages of blood donation, in your opinion?  _____________________________________________________________________.  What are the disadvantages of blood donation, from your perspective?  _____________________________________________________________________.  Is there anything else you associate with blood donation?  _____________________________________________________________________. |
| Normative beliefs | Are there any individuals or groups who would approve of you donating blood?  _____________________________________________________________________.  Are there any individuals or groups who would disapprove of you donating blood?  _____________________________________________________________________.  Is there anything else you associate with donating blood?  _____________________________________________________________________. |

1. If you donate a blood previously, for what purpose you donate a blood? _______________________________________
2. Is there anything else you would like to share about blood donation in your community please mention it? Please feel free to mention it below.

______________________________________________________________________________Thank you for your time and contribution to this important
